# Supplementary material
Source: HighWire-hosted journal article supplement (http://rc.rcjournal.com/highwire/filestream/26469/field_highwire_adjunct_files/3/Table_S3_Supplemental_Digital_Content.docx)
Supplement: Table_S3_Supplemental_Digital_Content.docx [file Table_S3_Supplemental_Digital_Content.docx]

**Table S3. Adverse Events Reported in Three Studies Comparing Prone vs. Supine in Acute Respiratory Distress Syndrome Patients**

| **Study** | **Adverse event** | **No. (%) of prone patients with adverse event*** | **No. (%) of supine patients with adverse event*** |
| --- | --- | --- | --- |
| Guérin, 2013 | Severe desaturation (SpO2 < 85%) | 155/237 (65.4%) | 164/229 (71.6%) |
|  | Hypotension | 35/237 (14.8%) | 48/229 (21.5%) |
|  | Unscheduled extubation | 31/237 (13.3%) | 25/229 (10.9%) |
|  | Bradycardia | 26/237 (10.9%) | 27/229 (11.8%) |
|  | Cardiac arrest | 16/237 (6.8%) | 31/229 (13.5%) |
|  | Airway obstruction | 11/237 (4.9%) | 5/229 (2.2%) |
|  | Displacement of endotracheal tube | 9/237 (3.8%) | 5/229 (2.2%) |
| Girard, 2014 | Total pressure sores | 116/204 (57.1%) | 79/186 (42.5%) |
|  | Pressure sore (Face) | 58/197 (29.4%) | 8/184 (4.3%) |
|  | Pressure sore (Sacrum) | 40/196 (20.4%) | 49/187 (26.2%) |
|  | Pressure sore (Chest) | 35/195 (17.9%) | 1/184 (0.5%) |
|  | Pressure sore (Heel) | 22/190 (11.6%) | 31/186 (16.7%) |
|  | Pressure sore (Back of head) | 6/191 (3.1%) | 3/184 (1.6%) |
|  | Pressure sore (Back) | 2/189 (1.1%) | 7/184 (3.8%) |
| Ayzac, 2015 | Ventilation-associated pneumonia | 52/237 (21.9%) | 41/229 (17.9%) |

*Proportion of patients who experienced the adverse event divided by the total number of patients from studies contributing data.

SpO2 = peripheral oxygen saturation.
